# Supplementary material
Source: MDPI journal article supplement (https://www.mdpi.com/2073-4344/10/3/299)
Supplement: s1 [file s1]

# Supplementary materials: Selective oxidation of methane over Fe-zeolites by *in situ* generated H<sub>2</sub>O<sub>2</sub>

Jongkyu Kang <sup>1</sup>, Eun Duck Park <sup>1,2,\*</sup>

<sup>1</sup> Department of Energy Systems Research, Ajou University, 206, World cup-ro, Yeongtong-Gu, Suwon-si 16499, Republic of Korea; edpark@ajou.ac.kr

<sup>2</sup> Department of Chemical Engineering, Ajou University, 206, World cup-ro, Yeongtong-Gu, Suwon-si, 16499, Republic of Korea

\* Correspondence: edpark@ajou.ac.kr

**Table S1.** Metal contents and BET surface area of Fe-zeolites.

| Name          | Fe (wt.%) | Al (wt.%) | SiO <sub>2</sub> /Al <sub>2</sub> O <sub>3</sub> | Surface area (m <sup>2</sup> /g) |
|---------------|-----------|-----------|--------------------------------------------------|----------------------------------|
| Fe-ZSM-5      | 0.919     | 2.12      | 30                                               | 355                              |
| Fe-mordenite  | 1.48      | 3.27      | 20                                               | 493                              |
| Fe-β          | 1.16      | 2.65      | 25                                               | 553                              |
| Fe-Y          | 0.705     | 5.05      | 12                                               | 703                              |
| Fe-ferrierite | 0.218     | 3.25      | 20                                               | 299                              |

**Table S2.** Metal contents in Fe-zeolites before the reaction and in the liquid after the reaction.<sup>a</sup>

| Fe-zeolites   | Metal content<br>( $\mu\text{mol}$ ) |    | Fe/Al                | Metal content in the liquid<br>( $\mu\text{mol}$ ) |      | Fraction of leached metal <sup>b</sup><br>(%) |     |
|---------------|--------------------------------------|----|----------------------|----------------------------------------------------|------|-----------------------------------------------|-----|
|               | Fe                                   | Al |                      | Fe                                                 | Al   | Fe                                            | Al  |
| Fe-ZSM-5      | 8.2                                  | 39 | 0.21                 | 0.41                                               | 0.93 | 5.0                                           | 2.4 |
| Fe-mordenite  | 13                                   | 61 | 0.22                 | 0.57                                               | 2.1  | 4.3                                           | 3.4 |
| Fe- $\beta$   | 10                                   | 49 | 0.21                 | 5.2                                                | 21   | 50                                            | 43  |
| Fe-Y          | 6.3                                  | 94 | $6.7 \times 10^{-2}$ | 4.3                                                | 71   | 69                                            | 76  |
| Fe-ferrierite | 1.9                                  | 60 | $3.2 \times 10^{-2}$ | 0.0                                                | 1.0  | 0                                             | 1.7 |

<sup>a</sup>Reaction conditions: 50 mg of each catalysts was used; reaction temperature = 30 °C, reaction time = 30 min.  $V_{\text{liquid}}$  = 30 mL,  $[\text{H}_2\text{SO}_4]$  = 15 mM.  $V_{\text{gas}}$  = 90 mL,  $P_{\text{CH}_4}$  = 15 bar,  $P_{\text{H}_2}$  = 3 bar,  $P_{\text{Air}}$  = 10 bar.

<sup>b</sup>The fraction of leached metal is the ratio of the amount of metal in the liquid after a reaction to the amount of metal introduced initially.

**Table S3.** Catalytic performance of 1.07 wt.% Fe-ZSM-5 and 1 wt.% Pd/AC at different reaction temperatures in the partial oxidation of methane.<sup>a</sup>

| Reaction temperature (°C) | [H <sub>2</sub> O <sub>2</sub> ] <sub>fin</sub> (mM) | Product (μmol)     |       |                     |                 | Total product | Selectivity to methane oxygenates <sup>b</sup> (%) |
|---------------------------|------------------------------------------------------|--------------------|-------|---------------------|-----------------|---------------|----------------------------------------------------|
|                           |                                                      | CH <sub>3</sub> OH | HCOOH | CH <sub>3</sub> OOH | CO <sub>2</sub> |               |                                                    |
| 0                         | 31                                                   | 12                 | 30    | 2                   | 1               | 45            | 98                                                 |
| 10                        | 24                                                   | 7                  | 42    | 2                   | 3               | 54            | 94                                                 |
| 20                        | 18                                                   | 9                  | 55    | 2                   | 9               | 75            | 88                                                 |
| 30                        | 8                                                    | 17                 | 84    | 2                   | 28              | 131           | 79                                                 |
| 40                        | 11                                                   | 6                  | 117   | 5                   | 54              | 182           | 70                                                 |
| 50                        | 7                                                    | 8                  | 124   | 4                   | 56              | 192           | 71                                                 |

<sup>a</sup>Reaction conditions: 50 mg of each catalysts was used; reaction time = 30 min, V<sub>liquid</sub> = 30 mL, [H<sub>2</sub>SO<sub>4</sub>] = 15 mM. V<sub>gas</sub> = 90 mL, P<sub>CH<sub>4</sub></sub> = 15 bar, P<sub>H<sub>2</sub></sub> = 3 bar, P<sub>Air</sub> = 10 bar.

<sup>b</sup>The selectivity to methane oxygenates was calculated as [moles of products excluding CO<sub>2</sub>]/[moles of total products] \* 100(%).

**Table S4.** Effect of pH on the performance of 0.766 wt.% Fe-ZSM-5 and 1 wt.% Pd/AC catalysts in the partial oxidation of methane.<sup>a</sup>

| [H <sub>2</sub> SO <sub>4</sub> ]<br>(mM) | pH  | [H <sub>2</sub> O <sub>2</sub> ] <sub>fin</sub><br>(mM) | Product (μmol)     |       |                     |                 | Total product | Selectivity to<br>methane oxygenates <sup>b</sup><br>(%) |
|-------------------------------------------|-----|---------------------------------------------------------|--------------------|-------|---------------------|-----------------|---------------|----------------------------------------------------------|
|                                           |     |                                                         | CH <sub>3</sub> OH | HCOOH | CH <sub>3</sub> OOH | CO <sub>2</sub> |               |                                                          |
| 0.15                                      | 3.3 | 0                                                       | 2                  | 0     | 0                   | 0               | 2             | 100                                                      |
| 1.5                                       | 2.3 | 1                                                       | 11                 | 5     | 1                   | 5               | 22            | 77                                                       |
| 15                                        | 1.3 | 10                                                      | 13                 | 60    | 3                   | 11              | 87            | 87                                                       |
| 150                                       | 0.7 | 17                                                      | 21                 | 89    | 2                   | 22              | 134           | 84                                                       |

<sup>a</sup>Reaction conditions: 50 mg of each catalysts was used; reaction temperature = 30 °C, reaction time = 30 min, V<sub>liquid</sub> = 30 mL, V<sub>gas</sub> = 90 mL, P<sub>CH<sub>4</sub></sub> = 15 bar, P<sub>H<sub>2</sub></sub> = 3 bar, P<sub>Air</sub> = 10 bar. H<sub>2</sub>SO<sub>4</sub> was used to adjust pH.

<sup>b</sup>The selectivity to methane oxygenates were calculated as [moles of products excluding CO<sub>2</sub>]/[moles of total products] \* 100(%).

**Table S5.** Effect of 1 wt.% Pd/AC on the catalytic performance of 0.766 wt.% Fe-ZSM-5 and 1 wt.% Pd/AC in the partial oxidation of methane.<sup>a</sup>

| Pd<br>( $\mu\text{mol}$ ) | $[\text{H}_2\text{O}_2]_{\text{fin}}$<br>(mM) | Product ( $\mu\text{mol}$ ) |                |                         |               | Total<br>product | Selectivity to methane<br>oxygenates <sup>b</sup><br>(%) |
|---------------------------|-----------------------------------------------|-----------------------------|----------------|-------------------------|---------------|------------------|----------------------------------------------------------|
|                           |                                               | $\text{CH}_3\text{OH}$      | $\text{HCOOH}$ | $\text{CH}_3\text{OOH}$ | $\text{CO}_2$ |                  |                                                          |
| 0.94                      | 30                                            | 11                          | 24             | 3                       | 2             | 40               | 95                                                       |
| 2.82                      | 14                                            | 9                           | 37             | 3                       | 8             | 57               | 85                                                       |
| 4.70                      | 10                                            | 13                          | 60             | 3                       | 11            | 87               | 87                                                       |

<sup>a</sup>Reaction conditions: 50 mg of 0.766 wt.% Fe-ZSM-5 and different amounts of 1 wt.% Pd/AC catalysts were used; reaction temperature = 30 °C, reaction time = 30 min;  $V_{\text{liquid}}$  = 30 mL,  $[\text{H}_2\text{SO}_4]$  = 15 mM.  $V_{\text{gas}}$  = 90 mL,  $P_{\text{CH}_4}$  = 15 bar,  $P_{\text{H}_2}$  = 3 bar,  $P_{\text{Air}}$  = 10 bar.

<sup>b</sup>The selectivity to methane oxygenates was calculated as [moles of products excluding  $\text{CO}_2$ ]/[moles of total products] \* 100(%). Metal content in 50 mg of catalyst was 6.85  $\mu\text{mol}$  for Fe.

**Table S6.** Effect of Fe content in Fe-ZSM-5 on the performance of Fe-ZSM-5 and 1 wt.% Pd/AC catalysts in the partial oxidation of methane.<sup>a</sup>

| Fe<br>( $\mu\text{mol}$ ) | $[\text{H}_2\text{O}_2]_{\text{fin}}$<br>(mM) | Product ( $\mu\text{mol}$ ) |                |                         |               |               | Selectivity to<br>methane<br>oxygenates <sup>b</sup><br>(%) |
|---------------------------|-----------------------------------------------|-----------------------------|----------------|-------------------------|---------------|---------------|-------------------------------------------------------------|
|                           |                                               | $\text{CH}_3\text{OH}$      | $\text{HCOOH}$ | $\text{CH}_3\text{OOH}$ | $\text{CO}_2$ | Total product |                                                             |
| 0.13                      | 7                                             | 5                           | 4              | 0                       | 0             | 9             | 100                                                         |
| 0.95                      | 5                                             | 10                          | 4              | 0                       | 0             | 14            | 100                                                         |
| 3.87                      | 8                                             | 12                          | 22             | 3                       | 4             | 41            | 90                                                          |
| 6.85                      | 10                                            | 13                          | 60             | 3                       | 11            | 87            | 87                                                          |
| 9.57                      | 8                                             | 17                          | 84             | 2                       | 28            | 131           | 79                                                          |

<sup>a</sup>Reaction conditions: 50 mg of each catalysts was used; reaction temperature = 30 °C, reaction time = 30 min,  $V_{\text{liquid}}$  = 30 mL,  $[\text{H}_2\text{SO}_4]$  = 15 mM.  $V_{\text{gas}}$  = 90 mL,  $P_{\text{CH}_4}$  = 15 bar,  $P_{\text{H}_2}$  = 3 bar,  $P_{\text{Air}}$  = 10 bar.

<sup>b</sup>The selectivity to methane oxygenates was calculated as [moles of products excluding  $\text{CO}_2$ ]/[moles of total products] \* 100(%).

**Table S7.** Metal content in the liquid and the fraction of leached metal after the reaction with 1.07 wt.% Fe-ZSM-5 and 1 wt.% Pd/AC at different temperatures.<sup>a</sup>

| Temperature<br>(°C) | Metal content in liquid<br>( $\mu\text{mol}$ ) |       | Fraction of metal leached <sup>b</sup><br>(%) |     |
|---------------------|------------------------------------------------|-------|-----------------------------------------------|-----|
|                     | Fe                                             | Al    | Fe                                            | Al  |
| 0                   | 0.417                                          | 1.389 | 4.3                                           | 3.6 |
| 10                  | 0.454                                          | 1.490 | 4.7                                           | 3.8 |
| 20                  | 0.540                                          | 1.470 | 5.6                                           | 3.8 |
| 30                  | 0.700                                          | 1.650 | 7.3                                           | 4.2 |
| 40                  | 0.935                                          | 1.741 | 9.8                                           | 4.5 |
| 50                  | 1.02                                           | 1.89  | 10.7                                          | 4.9 |

<sup>a</sup>Reaction conditions are same as those in Table S3.

<sup>b</sup>The fraction of leached metal is the ratio of the amount of metal in the liquid after a reaction to the amount of metal introduced initially.



**Table S8.** Metal content in the liquid and the fraction of leached metal after a reaction with 0.766 wt.% Fe-ZSM-5 and 1 wt.% Pd/AC at different pH.<sup>a</sup>

| [H <sub>2</sub> SO <sub>4</sub> ]<br>(mM) | pH  | Metal content in liquid<br>( $\mu$ mol) |      |      | Fraction of metal leached <sup>b</sup><br>(%) |     |     |
|-------------------------------------------|-----|-----------------------------------------|------|------|-----------------------------------------------|-----|-----|
|                                           |     | Fe                                      | Al   | Pd   | Fe                                            | Al  | Pd  |
| 0.15                                      | 3.3 | 0                                       | 0    | 0    | 0                                             | 0   | 0   |
| 1.5                                       | 2.3 | 0.26                                    | 1.19 | 0    | 3.8                                           | 3.0 | 0   |
| 15                                        | 1.3 | 0.53                                    | 1.62 | 0    | 7.8                                           | 4.1 | 0   |
| 150                                       | 0.7 | 0.64                                    | 1.62 | 0.09 | 9.4                                           | 4.1 | 1.9 |

<sup>a</sup>Reaction conditions are same as those in Table S4. Metal content in 50 mg of catalyst was 6.8  $\mu$ mol for Fe, 39.7  $\mu$ mol for Al, and 4.7  $\mu$ mol for Pd.

<sup>b</sup>The fraction of metal leached is the percentage of the amount of metal in liquid after reaction to the amount of metal introduced.

**Table S9.** Metal content in the liquid and the fraction of leached metal after a reaction with Fe-ZSM-5 containing different Fe contents and 1 wt.% Pd/AC catalysts.<sup>a</sup>

| Catalyst        | Initial Fe content (μmol) | Initial molar ratio of Fe/Al | Metal content in the liquid (μmol) |      | Fraction of metal leached (%) |     |
|-----------------|---------------------------|------------------------------|------------------------------------|------|-------------------------------|-----|
|                 |                           |                              | Fe                                 | Al   | Fe                            | Al  |
| H-ZSM-5         | 0.13                      | 0.003                        | 0                                  | 1.48 | 0                             | 3.8 |
| 0.106% Fe-ZSM-5 | 0.9                       | 0.024                        | 0.06                               | 1.58 | 6.4                           | 4.0 |
| 0.433% Fe-ZSM-5 | 3.9                       | 0.097                        | 0.20                               | 1.75 | 5.0                           | 4.4 |
| 0.766% Fe-ZSM-5 | 6.8                       | 0.173                        | 0.53                               | 1.62 | 7.8                           | 4.1 |
| 1.07% Fe-ZSM-5  | 9.6                       | 0.246                        | 0.70                               | 1.65 | 7.3                           | 4.2 |

<sup>a</sup>Reaction conditions are same as Table S7.

<sup>b</sup>The fraction of metal leached is the percentage of the amount of metal in liquid after reaction to the amount of metal introduced.

**Table S10.** Catalytic performance of different concentrations of 1 wt.% Pd/AC and FeSO<sub>4</sub> in the partial oxidation of methane.<sup>a</sup>

| Fe<br>( $\mu$ mol) | [H <sub>2</sub> O <sub>2</sub> ] <sub>fin</sub><br>(mM) | Product ( $\mu$ mol) |       |                     |                 | Total<br>product | Selectivity to methane<br>oxygenates <sup>b</sup><br>(%) |
|--------------------|---------------------------------------------------------|----------------------|-------|---------------------|-----------------|------------------|----------------------------------------------------------|
|                    |                                                         | CH <sub>3</sub> OH   | HCOOH | CH <sub>3</sub> OOH | CO <sub>2</sub> |                  |                                                          |
| 0.015              | 1                                                       | 5                    | 2     | 0                   | 0               | 7                | 100                                                      |
| 0.15               | 10                                                      | 7                    | 20    | 0                   | 9               | 36               | 76                                                       |
| 0.96               | 13                                                      | 11                   | 84    | 0                   | 31              | 126              | 75                                                       |
| 4.78               | 7                                                       | 19                   | 171   | 5                   | 140             | 335              | 58                                                       |
| 11.2               | 5                                                       | 13                   | 218   | 6                   | 303             | 540              | 44                                                       |

<sup>a</sup>Reaction conditions: 50 mg of 1 wt.% Pd/AC were used; reaction temperature = 30 °C, reaction time = 30 min, V<sub>liquid</sub> = 30 mL, [H<sub>2</sub>SO<sub>4</sub>] = 15 mM. V<sub>gas</sub> = 90 mL, P<sub>CH<sub>4</sub></sub> = 15 bar, P<sub>H<sub>2</sub></sub> = 3 bar, P<sub>Air</sub> = 10 bar.

<sup>b</sup>The selectivity to methane oxygenates was calculated as [moles of products excluding CO<sub>2</sub>]/[moles of total products] \* 100(%).

**Table S11.** Catalytic performance for partial oxidation of methane under different conditions.

| Entry          | Catalyst                       | H <sub>2</sub> O <sub>2</sub> conv.<br>(%) | Product (μmol)     |       |                     |                 | Selectivity to methane<br>oxygenate<br>(%) |
|----------------|--------------------------------|--------------------------------------------|--------------------|-------|---------------------|-----------------|--------------------------------------------|
|                |                                |                                            | CH <sub>3</sub> OH | HCOOH | CH <sub>3</sub> OOH | CO <sub>2</sub> |                                            |
| 1 <sup>a</sup> | 0.919% Fe-ZSM-5                | 11                                         | 17                 | 102   | 13                  | 10              | 93                                         |
| 2 <sup>b</sup> | 0.919% Fe-ZSM-5                | 7                                          | 18                 | 104   | 12                  | 3               | 98                                         |
| 3 <sup>c</sup> | Leaching solution <sup>d</sup> | 0                                          | 0                  | 0     | 0                   | 0               | n.d.                                       |
| 4 <sup>e</sup> | 0.919%Fe-ZSM-5+1%Pd/AC         | In situ                                    | 22                 | 52    | 0                   | 16              | 82                                         |

<sup>a</sup>Reaction conditions: 50 mg of catalyst was used. Reaction temperature = 30 °C, reaction time = 30 min; V<sub>liquid</sub> = 30 mL, [H<sub>2</sub>O<sub>2</sub>]=0.28 M in H<sub>2</sub>O; V<sub>gas</sub> = 95 mL, P<sub>CH<sub>4</sub></sub> =15 bar, P<sub>N<sub>2</sub></sub> = 13 bar.

<sup>b</sup>Reaction conditions: 50 mg of catalyst was used. Reaction temperature = 30 °C, reaction time = 30 min; V<sub>liquid</sub> = 30 mL, [H<sub>2</sub>O<sub>2</sub>]=0.28 M in H<sub>2</sub>O, [H<sub>2</sub>SO<sub>4</sub>] = 15 mM; V<sub>gas</sub> = 95 mL, P<sub>CH<sub>4</sub></sub> =15 bar, P<sub>N<sub>2</sub></sub> = 13 bar.

<sup>c</sup>Reaction conditions: Reaction temperature = 30 °C, reaction time = 30 min; V<sub>liquid</sub> = 30 mL, [H<sub>2</sub>O<sub>2</sub>]=0.28 M in H<sub>2</sub>O; V<sub>gas</sub> = 95 mL, P<sub>CH<sub>4</sub></sub> =15 bar, P<sub>N<sub>2</sub></sub> = 13 bar.

<sup>d</sup>Leaching solution was obtained by contacting 50 mg of Fe-ZSM-5 with 30 mL of aqueous 15 mM of H<sub>2</sub>SO<sub>4</sub> at 30 °C for 30 min.

<sup>e</sup>Reaction conditions: 50 mg of Fe-ZSM-5 and 50 mg of Pd/AC catalyst was used. Reaction temperature = 30 °C, reaction time = 30 min; V<sub>liquid</sub> = 30 mL, [H<sub>2</sub>SO<sub>4</sub>] = 15 mM. V<sub>gas</sub> = 90 mL, P<sub>CH<sub>4</sub></sub> =15 bar, P<sub>H<sub>2</sub></sub> = 3 bar, P<sub>Air</sub> = 10 bar.

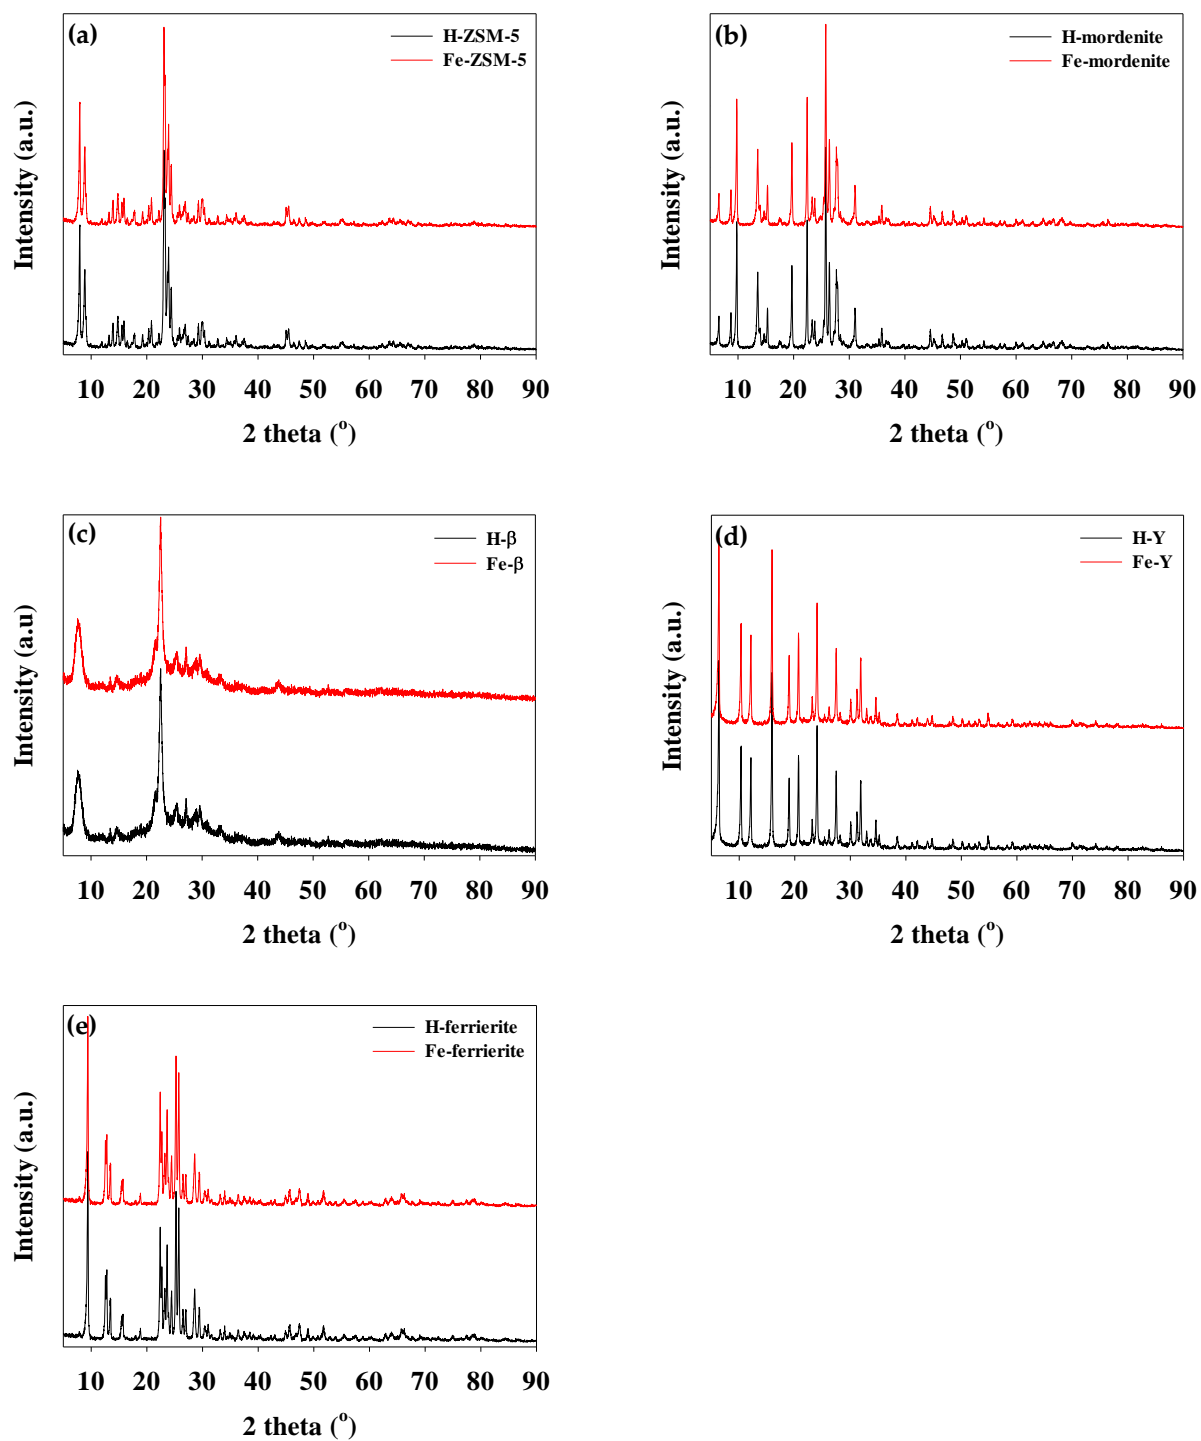

**Figure S1.** XRD patterns of (a) H-ZSM-5 and Fe-ZSM-5, (b) H-mordenite and Fe-mordenite, (c) H- $\beta$  and Fe- $\beta$ , (d) H-Y and Fe-Y, and (e) H-ferrierite and Fe-ferrierite.

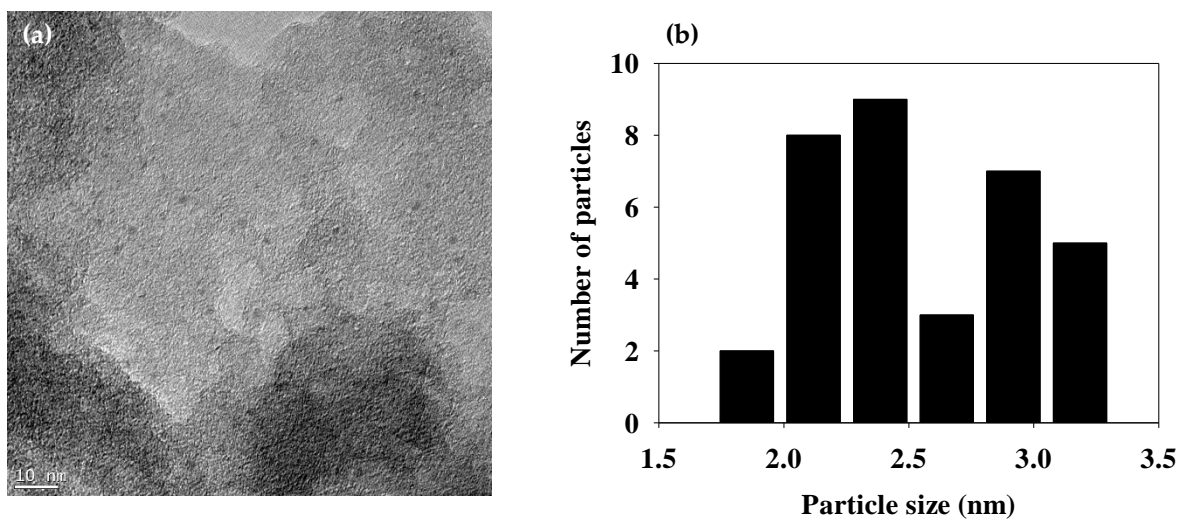

**Fig. S2.** TEM image (a) and particle size distribution of Pd metal (b) of 1 wt.% Pd/AC .
